# Supplementary material for: α-Fe2O3 nanopillar arrays fabricated by electron beam evaporation for the photoassisted degradation of dyes with H2O2
Source: Royal Society of Chemistry journal article supplement (doi:10.1039/c5ra17894k), 2015-12-16
Supplement: c5ra17894k1.pdf [file c5ra17894k1.pdf]

## Supporting Information

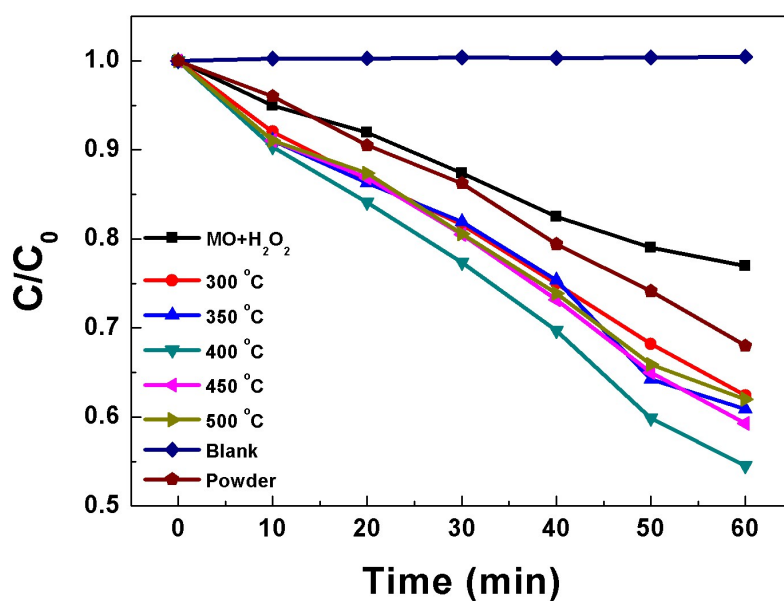

Figure S1. Degradation curve of methyl orange of  $\alpha$ -Fe<sub>2</sub>O<sub>3</sub> nanopillars and powder samples

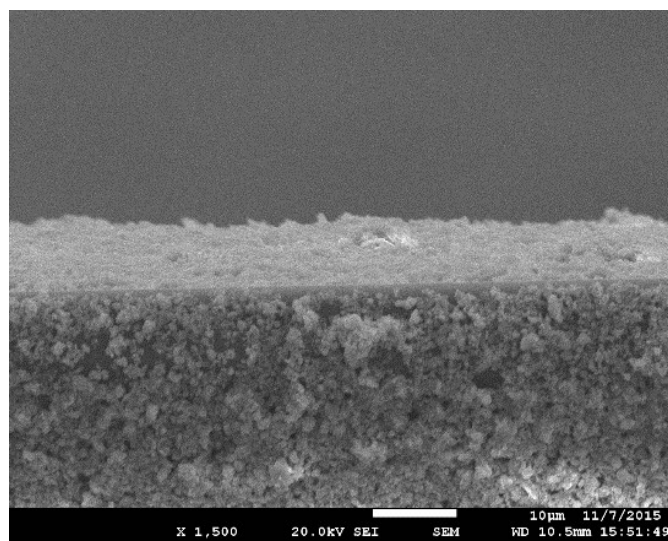

Figure S2. Sectional view of powder Fe<sub>2</sub>O<sub>3</sub> sample
